# Supplementary material
Source: PubMed Central journal article supplement (PMC2862772)

## Supplementary Data

### **Let-7g targets *collagen type I α2* and inhibits cell migration in hepatocellular carcinoma**

Junfang Ji<sup>1\*</sup>, Lei Zhao<sup>1,3\*</sup>, Anuradha Budhu<sup>1</sup>, Marshonna Forgues<sup>1</sup>, Hu-Liang Jia<sup>2</sup>, Lun-Xiu Qin<sup>2</sup>, Qing-Hai Ye<sup>2</sup>, Jinming Yu<sup>3</sup>, Xuetao Shi<sup>3</sup>, Zhao-You Tang<sup>2</sup>, Xin Wei Wang<sup>1</sup>

<sup>1</sup> Liver Carcinogenesis Section, Laboratory of Human Carcinogenesis, Center for Cancer Research, National Cancer Institute, Bethesda, MD, USA; <sup>2</sup> Liver Cancer Institute and Zhongshan Hospital, Fudan University, Shanghai and <sup>3</sup> Shandong Provincial Tumor Hospital and Institute of Oncology, Jinan, China

*\*These authors contributed equally to this work.*

**Running title:** Let-7g and hepatocellular carcinoma metastasis

Correspondence to: Dr. Xin Wei Wang, 37 Convent Dr., MSC 4258, Building 37, Room 3044A, Bethesda, MD 20892, USA. Phone: 301-496-2099; Fax: 301-496-0497; E-mail: xw3u@nih.gov

Supplementary Table 1. The predicted target genes of let-7g\*.

| Target genes | Gene name                    | Number of BS <sup>†</sup> | Total context score <sup>‡</sup> | Context score percentile <sup>§</sup> |
|--------------|------------------------------|---------------------------|----------------------------------|---------------------------------------|
| COL1A2       | collagen, type I, alpha 2    | 1                         | -0.44                            | 99                                    |
| COL3A1       | collagen, type III, alpha 1  | 1                         | -0.40                            | 98                                    |
| COL14A1      | collagen, type XIV, alpha 1  | 1                         | -0.28                            | 91                                    |
| COL24A1      | collagen, type XXIV, alpha 1 | 1                         | -0.20                            | 76                                    |
| COL1A1       | collagen, type I, alpha 1    | 1                         | -0.19                            | 73                                    |
| COL15A1      | collagen, type XV, alpha 1   | 1                         | -0.19                            | 73                                    |
| COL5A2       | collagen, type V, alpha 2    | 1                         | -0.18                            | 70                                    |
| COL4A2       | collagen, type IV, alpha 2   | 1                         | -0.15                            | 60                                    |
| COL19A1      | collagen, type XIX, alpha 1  | 1                         | -0.15                            | 60                                    |
| COL4A1       | collagen, type IV, alpha 1   | 1                         | -0.12                            | 46                                    |
| COL4A5       | collagen, type IV, alpha 5   | 1                         | -0.11                            | 45                                    |

Note:

\* All information was collected from [http://www.targetscan.org/cgi-bin/vert\\_42/targetscan.cgi?mirg=hsa-let-7g](http://www.targetscan.org/cgi-bin/vert_42/targetscan.cgi?mirg=hsa-let-7g).

<sup>†</sup> BS, binding site. All binding sites are conserved sites.

<sup>‡</sup> The context score for a specific site is the sum of the contribution of these four features: site-type contribution, 3' pairing contribution, local AU contribution and position contribution. The sum of the context scores for each miRNA was calculated, and the lowest score is displayed. A more negative score is associated with a more favorable site.

<sup>§</sup> The context score percentile rank is the percentage of sites for this miRNA with a less favorable context score.

## Legends

**Supplementary Figure 1. Metastasis associated let-7g is down-regulated in HpSC-HCC and isolated EpCAM<sup>+</sup> HpSC-HCC cells.** (A) Let-7g expression by microarray in HpSC-HCC (n=50) and MH-HCC (n=95) samples. (B) Let-7g expression was detected in isolated EpCAM<sup>+</sup>-HpSC cells and EpCAM<sup>-</sup> cells from HuH1 cell line.

# Supplementary Figure 1

A.

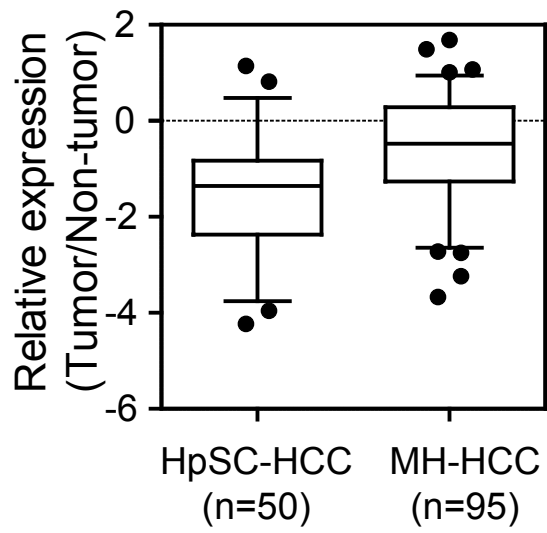

B.

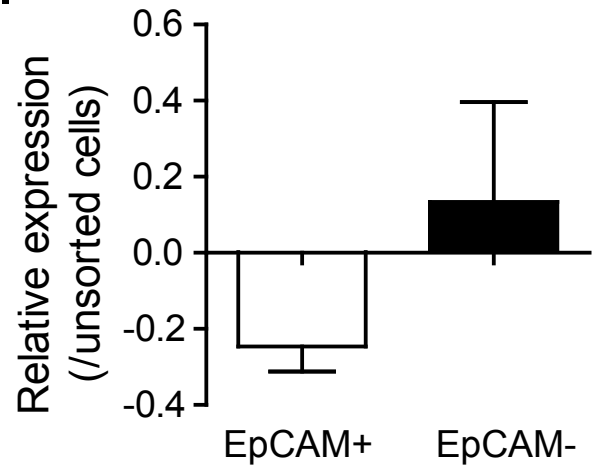

Supplement: NIHMS180670-supplement-01.pdf [file NIHMS180670-supplement-01.pdf]
